# Supplementary material
Source: MDPI journal article supplement (https://www.mdpi.com/2221-3759/9/3/23)
Supplement: s1 [file s1]

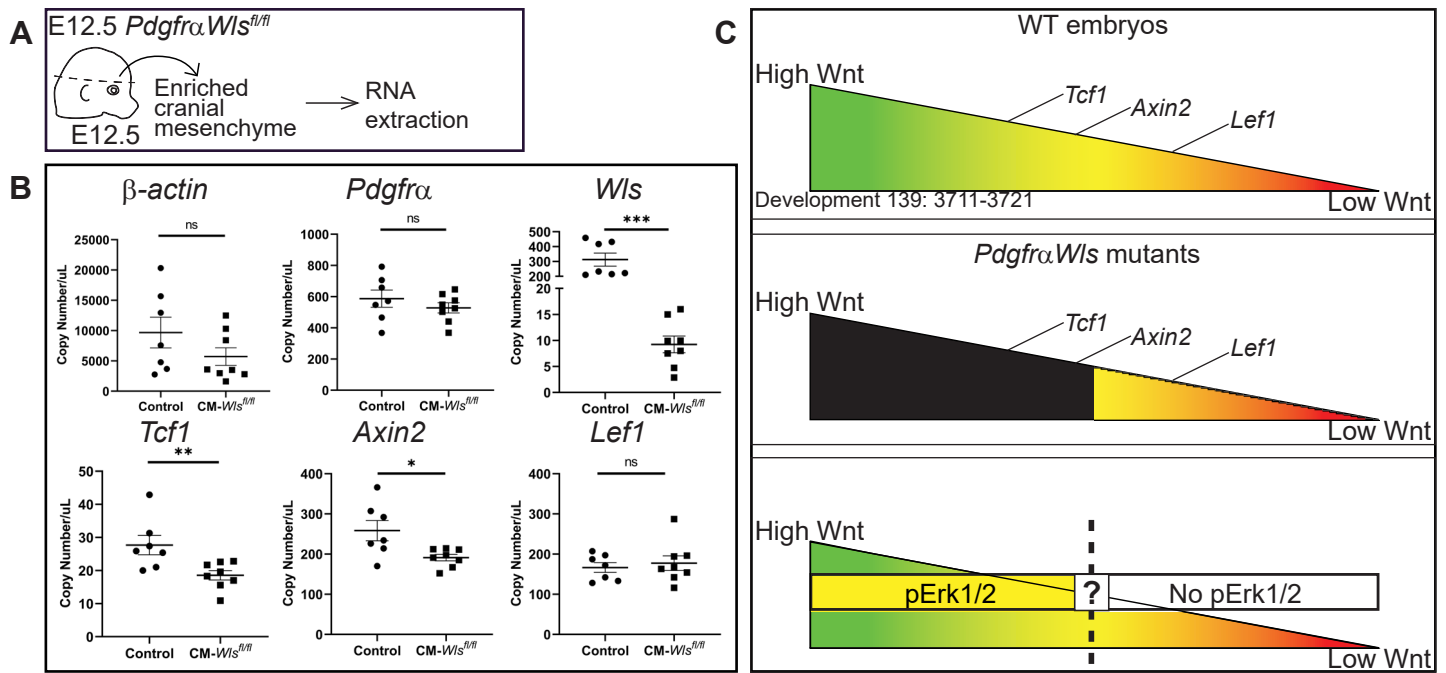

**Figure S4. Mesenchyme *Wntless* (*Wls*) is required for variable expression of Wnt target genes.** (A) Schematic depicting work flow and tissue source for ddPCR analysis in panel B. (B) Total copy number/μL of indicated genes as determined by DDPCR. (C) Hypothesized model of Wnt signaling threshold within the cranial mesenchyme of Wild-type (top), mesenchyme *Wls* mutants (middle) and putative model for Wnt-dependent Erk activation (bottom).
