# Supplementary material
Source: MDPI journal article supplement (https://www.mdpi.com/2221-3759/9/3/23)
Supplement: s1 [file s1]

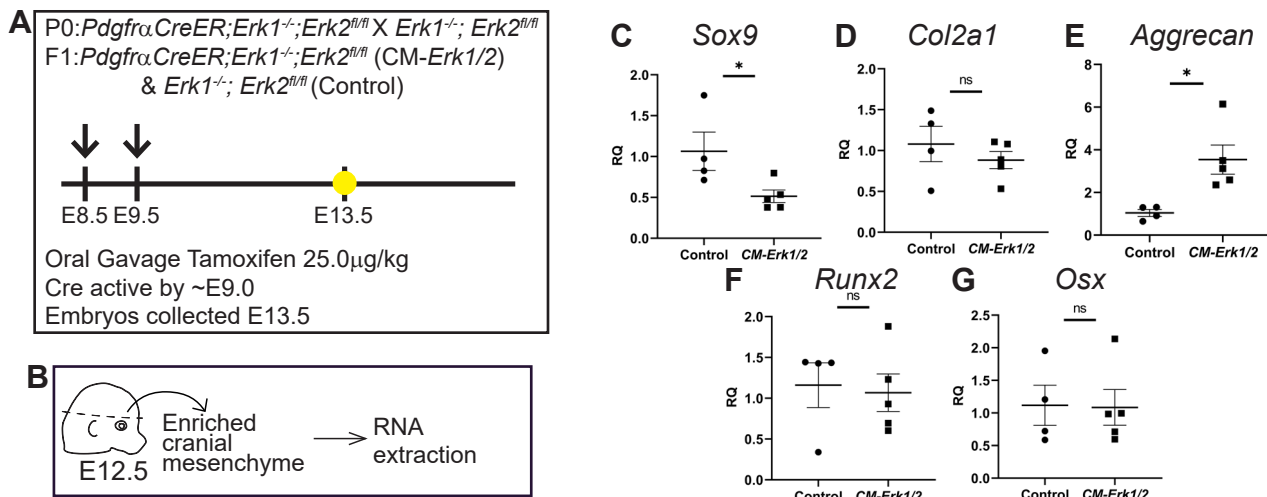

**Figure S1. RT-qPCR of cartilage and bone lineage markers in CM-ERK1/2 and controls.** Schematics depicting the gavage regimen and timing of deletion of *Erk2* (A), and the work flow and tissue source for the RNA analysis (B). RT-qPCR analysis of cartilage markers *Sox9* (C), *Col2a1* (D), and *Aggrecan* (E) and bone markers *Runx2* (F) and *Osx* (G).  $n = 4-5$
